# Supplementary material for: Tailoring light emission properties and optoelectronic and optothermal responses from rare earth-doped bismuth oxide for multifunctional light shielding, temperature sensing, and photodetection
Source: Royal Society of Chemistry journal article supplement (doi:10.1039/c7ra08490k), 2017-01-01
Supplement: c7ra08490k1.pdf [file c7ra08490k1.pdf]

## Supporting Information

Tailoring light emission properties, optoelectronic and  
optothermal responses from rare earth-doped bismuth  
oxide for multifunctional light shielding, temperature  
sensing and photodetector

Liumin Fan<sup>a</sup>, Yang Li<sup>a,b,\*</sup>, Xiaohui Lin<sup>a</sup>, Junhao Peng<sup>a</sup>, Guifang Ju<sup>a</sup>, Shaoan  
Zhang<sup>a,d</sup>, Li Chen<sup>a</sup>, Fupo He<sup>c</sup>, Yihua Hu<sup>a,\*</sup>

<sup>a</sup> School of Physics and Optoelectronic Engineering, Guangdong University of Technology, Guangzhou 510006, China.

<sup>b</sup> State Key Laboratory of Luminescent Materials and Devices, South China University of Technology, Guangzhou 510640, China.

<sup>c</sup> School of Electromechanical Engineering, Guangdong University of Technology, Guangzhou 510006, China.

<sup>d</sup> Guangzhou Maritime University, Guangzhou 510006, China.

**Corresponding authors:** huyh@gdut.edu.cn; lychris@sina.com

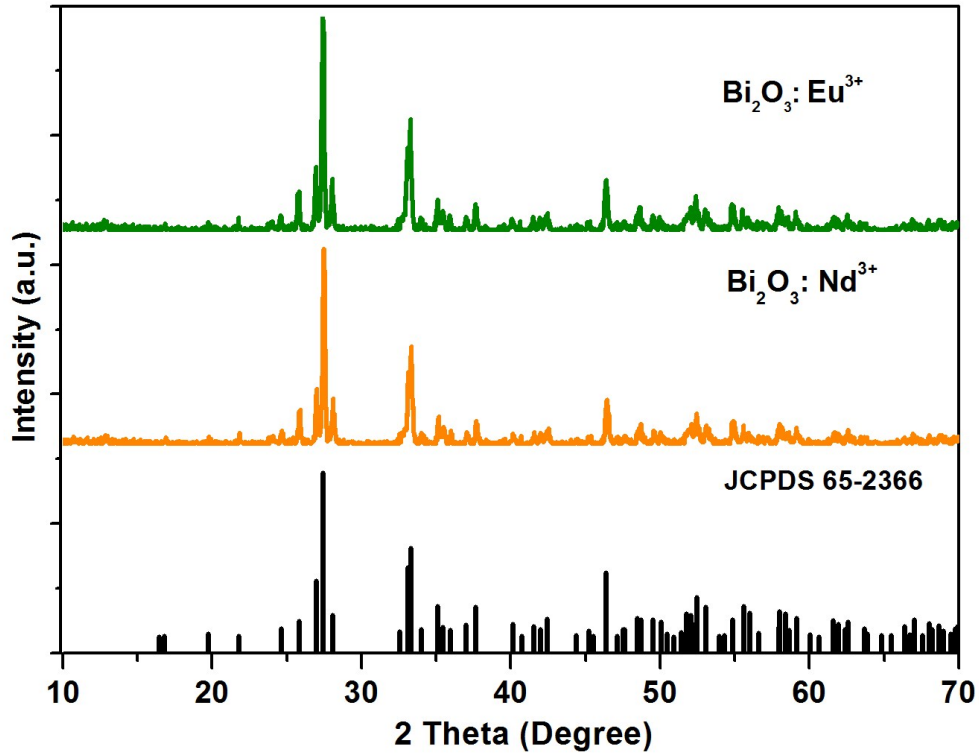

**Figure S1:** The XRD patterns of  $\text{Bi}_2\text{O}_3$  and  $\text{Bi}_2\text{O}_3: \text{Re}^{3+}$  ( $\text{Re}^{3+} = \text{Nd}^{3+}, \text{Eu}^{3+}$ ) with PDF card of  $\text{Bi}_2\text{O}_3$ .

The phases of the as prepared are first explored by XRD analysis and the results are shown in Figure S1. The acquired XRD pattern of  $\text{Bi}_2\text{O}_3: \text{Re}^{3+}$  ( $\text{Re}^{3+} = \text{Nd}^{3+}, \text{Eu}^{3+}$ ) are similar to that of the pure  $\text{Bi}_2\text{O}_3$  and all the diffraction peaks of pure  $\text{Bi}_2\text{O}_3$  and  $\text{Bi}_2\text{O}_3: \text{Re}^{3+}$  ( $\text{Re}^{3+} = \text{Nd}^{3+}, \text{Eu}^{3+}$ ) sample are well indexed to JCPDS no. 65–2366. Further, no other impurity phases are observed in pure  $\text{Bi}_2\text{O}_3$  and  $\text{Bi}_2\text{O}_3: \text{Re}^{3+}$  ( $\text{Re}^{3+} = \text{Nd}^{3+}, \text{Eu}^{3+}$ ) samples, indicating that the pure  $\alpha\text{-Bi}_2\text{O}_3$  are successfully synthesized as host material and the dopants had no significant influence on the hosts' lattice.

Figure 2a, S2 shows the calculated band structure of  $\text{Bi}_2\text{O}_3$  and  $\text{Bi}_2\text{O}_3: \text{Sm}^{3+}$ , respectively. Structure relaxations and properties calculations are performed using density functional theory (DFT)<sup>1</sup> within the generalized gradient approximation (GGA)<sup>2</sup> as implemented in the VASP code<sup>3</sup>. Energy convergence precision and the plane wave kinetic energy cutoff are set to  $10^{-5}$  eV and 500eV. We sample the Brillouin zone with uniform  $\Gamma$ -centered meshes of  $2\pi \cdot 0.05 \text{ \AA}^{-1}(4 \times 3 \times 3)$  for structure relaxations and  $2\pi \cdot 0.03 \text{ \AA}^{-1}(7 \times 5 \times 5)$  for properties calculations. The band-gap energy of  $\text{Bi}_2\text{O}_3: \text{Sm}^{3+}$  is obtained (1.6 eV, Figure S2) through the theoretical calculation. And,

the experimental diffuse reflectance of the  $\text{Bi}_2\text{O}_3: \text{Sm}^{3+}$  sample is turned into a Kubelka–Munk function  $F(R)$  in Figure S3. As an approximation, we can read the value of band-gap energy in  $\text{Bi}_2\text{O}_3: \text{Sm}^{3+}$  sample is 2.42 eV. Analogously, the experimental value of band-gap energy of  $\text{Bi}_2\text{O}_3$  sample is in agreement with our theoretical calculation.

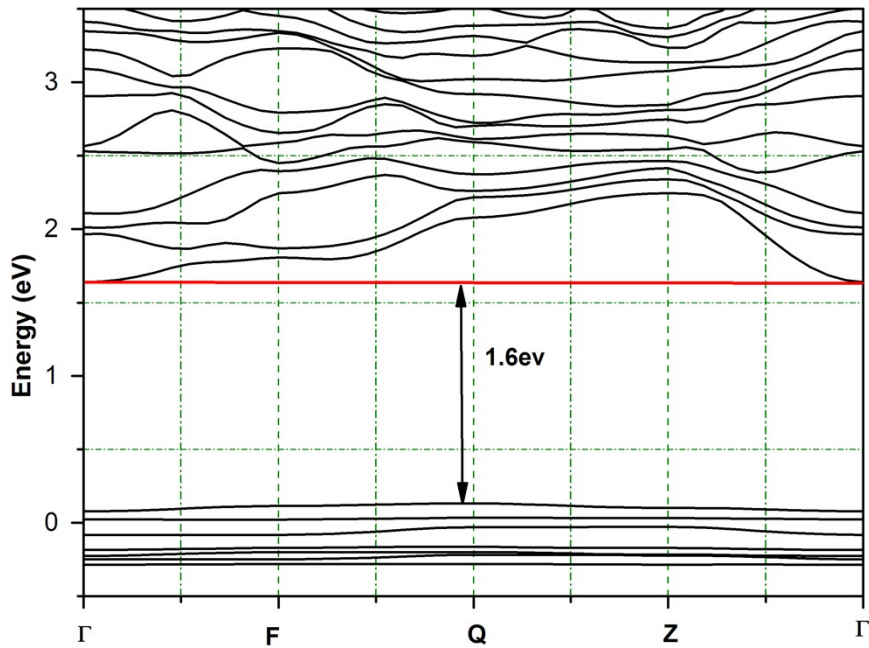

**Figure S2:** The Calculated band structure for  $\text{Bi}_2\text{O}_3: \text{Sm}^{3+}$ .

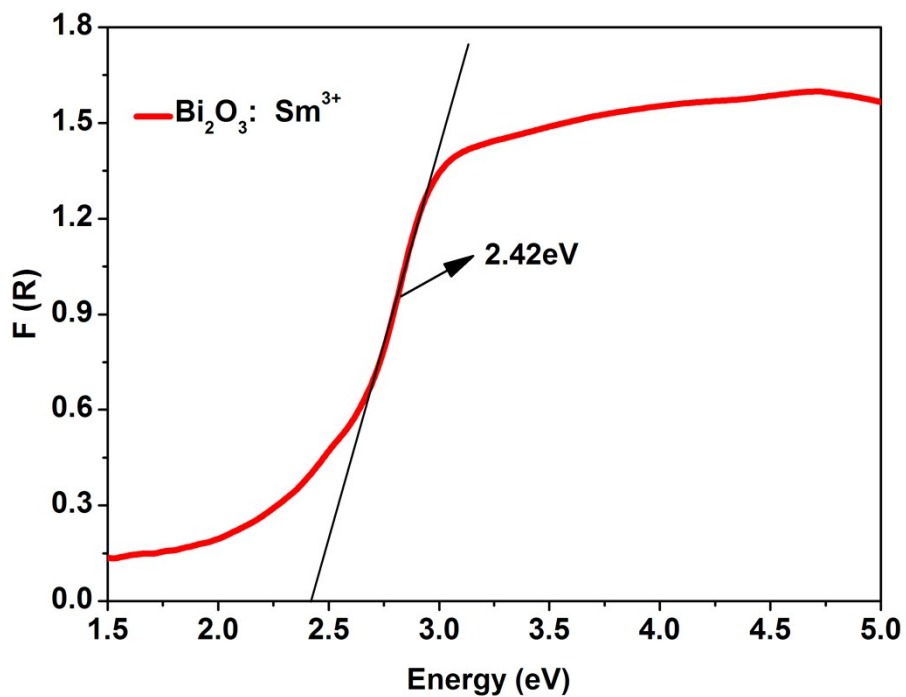

**Figure S3:** Experimental diffuse reflectance is turned into a Kubelka–Munk function  $F(R)$ .  $(h\nu F(R))^{1/2} - h\nu$  plot of the of the  $\text{Bi}_2\text{O}_3: \text{Sm}^{3+}$ . The bandgap energy is estimated from the intercept of a fitted straight line (black).

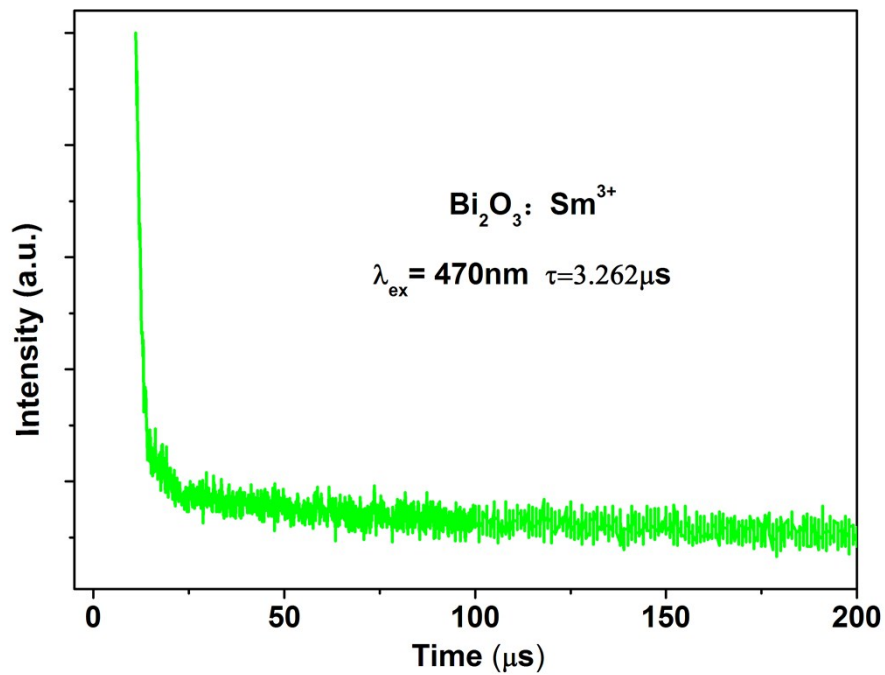

**Figure S4:** Decay curves of  $\text{Bi}_2\text{O}_3: \text{Sm}^{3+}$  phosphor (excited at 470 nm, and monitored at 653nm).

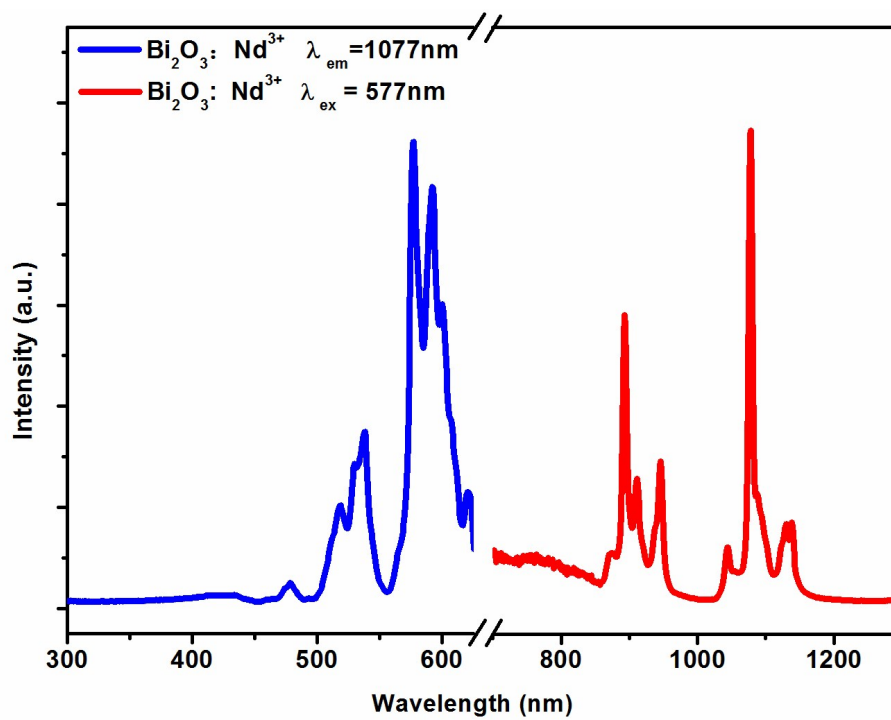

Figure S5: PLE (left) and PL (right) spectra of Bi<sub>2</sub>O<sub>3</sub>: Nd<sup>3+</sup> phosphor.

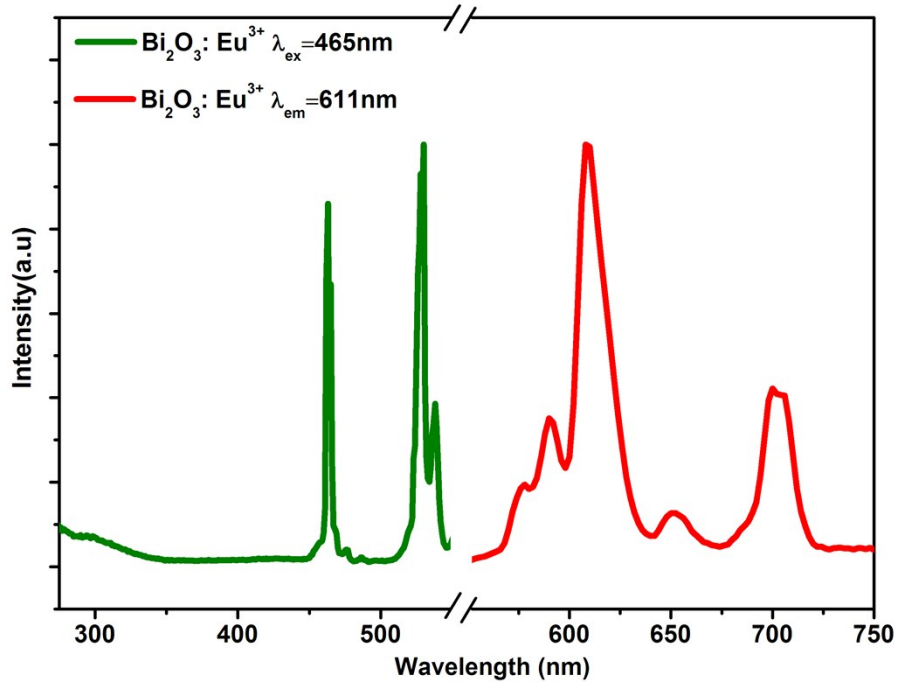

Figure S6. PLE (left) and PL (right) spectra of Bi<sub>2</sub>O<sub>3</sub>: Eu<sup>3+</sup> phosphor.

The PLE and PL spectra of Bi<sub>2</sub>O<sub>3</sub>: Re<sup>3+</sup> (Re<sup>3+</sup> =Nd<sup>3+</sup>, Eu<sup>3+</sup>) are shown in Figure S5, S6. From Figure S5, we can see that the PLE spectra of Bi<sub>2</sub>O<sub>3</sub>: Nd<sup>3+</sup> contains a series of excitation monitored at 1077 nm peaks at 577 nm and 536 nm, which are assigned to the  $^4I_{9/2} \rightarrow ^4G_{5/2}$ ,  $^4I_{9/2} \rightarrow ^4G_{7/2}$  transitions of the Nd<sup>3+</sup> ions, respectively. And, the emission spectra is constitute of many typical emission bands centered at 1077 nm and 890 nm under 577nm excitation, which can be ascribed to the electronic transitions of Nd<sup>3+</sup> from  $^4F_{3/2}$  to  $^4I_{11/2}$ ,  $^4H_{9/2}$ , respectively. Furthermore, from Figure S6, we should note that the 465 nm and 529 nm excitation bands in Bi<sub>2</sub>O<sub>3</sub>: Eu<sup>3+</sup> originate from the  $^7F_0 \rightarrow ^5D_2$ ,  $^7F_0 \rightarrow ^5D_1$  transition in PLE spectra. the band at 611 nm and 700 nm should be assigned to the  $^5D_0 \rightarrow ^7F_2$ ,  $^5D_0 \rightarrow ^7F_4$  transitions of Eu<sup>3+</sup> ions in PL spectra. All the investigation about PL and PLE spectra can be well according with our theoretical conjecture.

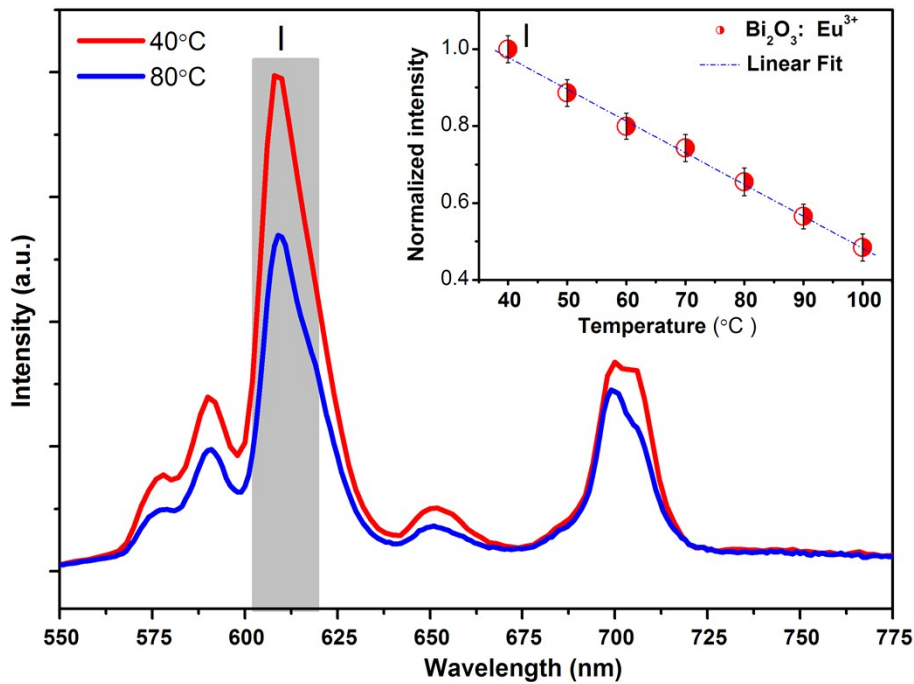

**Figure S7:** Temperature-dependent emission spectrum of  $\text{Bi}_2\text{O}_3: \text{Eu}^{3+}$ . The inset shows the variation of intensity ( $I$ ) as a function of the temperature.

A monolog plot of the normalized PL emission intensity ( $I$ ) at 611nm as a function of temperature in the range of 40–100°C is shown in Figure S7(a). We find that the luminescence intensity changes linearly with temperature with excellent temperature sensitivity ( $0.8\% \text{ } ^\circ\text{C}^{-1}$ ).

The stable  $I$ - $V$  curve of  $\text{Bi}_2\text{O}_3: \text{Nd}^{3+}$  bias on 30 V is shown in Figure S8(a), which are excited with the light of different wavelength (254, 460 and 590 nm) under the same measurement condition. And, the peak of current sample at a bias of 30 V is plotted as a function of wavelength is shown as in Figure 5c. Further, the dark current ( $\sim 0.205 \mu\text{A}$ ) is found to be lowest and an abrupt increase in the current is observed. Apparently, the current corresponding to 254, 460 and 590 nm wavelength reached  $\sim 0.254$ ,  $\sim 0.229$  and  $\sim 0.329 \mu\text{A}$ .

The thermal sensitivity resulting from temperature dependence of the intensity can be calculated by

$$S = dI/dT \quad (1)$$

where  $S$  denotes the thermal sensitivity,  $I$  denotes the intensity of emission band at

653 nm and T denotes the temperature of the samples (°C).

Further, the thermal sensitivity resulting from spectra shift can be calculated by

$$S = d(\Delta\lambda)/dT \quad (2)$$

where S denotes the thermal sensitivity,  $\Delta\lambda$  denotes the D-value of spectral shift (nm), T denotes the temperature of the samples (°C).

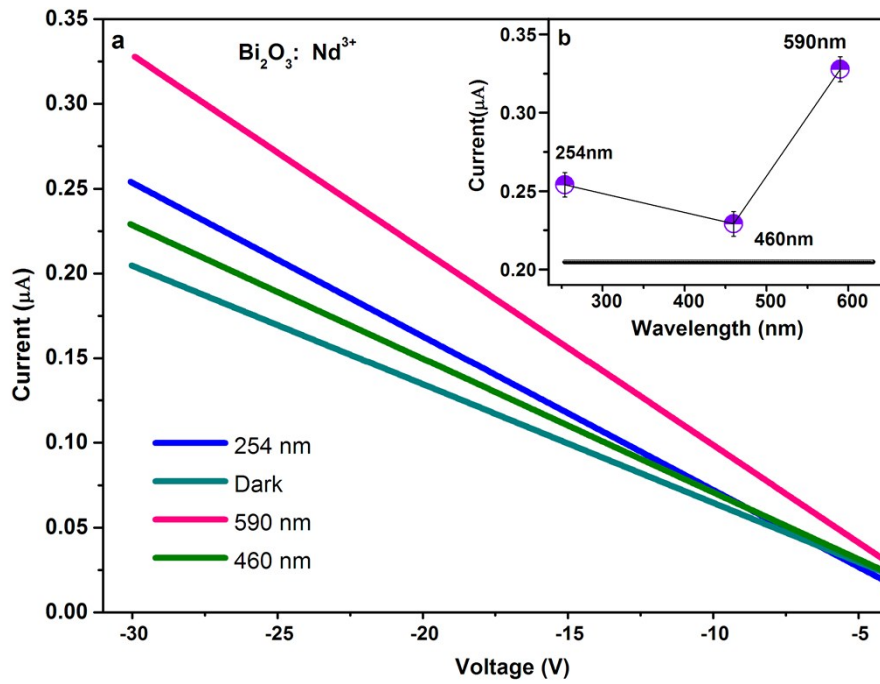

**Figure S8: The optoelectronic performance of Bi<sub>2</sub>O<sub>3</sub>: Nd<sup>3+</sup> phosphor** (a) The current response under dark, 254, 460, and 590 nm excitation of Bi<sub>2</sub>O<sub>3</sub>: Nd<sup>3+</sup>. (b) The inset shows the variation of current with increasing illumination wavelength.

## References

1. P. E. Blöchl, *Phys. Rev.*, 1994, B50, 17953–17979.
2. J. P. Perdew, K. Burke and M. Ernzerhof, *Phys. Rev. Lett.*, 1996, 77, 3865–3868.
3. G. Kresse and J. Furthmüller, *Phys. Rev. B*, 1996, 54, 11169–11186.
